# Supplementary material for: From well-defined Pt(ii) surface species to the controlled growth of silica supported Pt nanoparticles
Source: Royal Society of Chemistry journal article supplement (doi:10.1039/c2dt31639k), 2012-10-22
Supplement: c2dt31639k.pdf [file c2dt31639k.pdf]

## Supporting information

### From well-defined Pt(II) surface species to the controlled growth of silica supported Pt nanoparticles

*Pierre Laurent,<sup>a,b</sup> Laurent Veyre,<sup>a</sup> Chloé Thieuleux,<sup>a</sup> Sébastien Donet,<sup>b</sup> and Christophe Copéret<sup>a,c</sup>*

*a Université de Lyon, Institut de Chimie de Lyon, UMR C2P2 - CNRS - Université Lyon 1- ESCPE Lyon, Equipe Chimie Organométallique de Surface 43, Bd du 11 Novembre 1918 F-69616 Villeurbanne, France.*

*b CEA, LITEN, Département des Technologies des Nanomatériaux, Laboratoire des Technologies de Surfaces (LTS), 17, Rue des Martyrs, 38054 Grenoble, France*

*c Present address: ETH Zürich, Department of Chemistry, Laboratory of Inorganic Chemistry, Wolfgang Pauli Strasse 10, CH-8093, Zürich, Switzerland.*

|    |                                                                                        |    |
|----|----------------------------------------------------------------------------------------|----|
| A. | Analytical techniques .....                                                            | 2  |
| B. | Single Crystal X-Ray diffraction .....                                                 | 3  |
| C. | (COD)Pt(Me) <sub>2</sub> .....                                                         | 4  |
| D. | (COD)Pt(OSi(O <i>t</i> Bu) <sub>3</sub> ) <sub>2</sub> .....                           | 8  |
| E. | (COD)Pt(Me)(OSi(O <i>t</i> Bu) <sub>3</sub> ) .....                                    | 12 |
| F. | (COD)Pt(Me)N(SiMe <sub>3</sub> ) <sub>2</sub> .....                                    | 16 |
| G. | (COD)Pt(Cl)(N(SiMe <sub>3</sub> ) <sub>2</sub> ) .....                                 | 21 |
| H. | (COD)Pt(OSi(O <i>t</i> Bu) <sub>3</sub> )(N(SiMe <sub>3</sub> ) <sub>2</sub> ) .....   | 24 |
| I. | HOSi(O <i>t</i> Bu) <sub>3</sub> .....                                                 | 28 |
| J. | <sup>13</sup> C SS-NMR spectra of Pt complexes grafted onto SiO <sub>2-200</sub> ..... | 30 |
| K. | Maximum surface coverage for (COD)Pt(R)(OSi≡) species .....                            | 30 |

## **A. Analytical techniques**

### **Solid State Nuclear Magnetic Resonance Spectroscopy**

$^1\text{H}$  magic angle spinning (MAS) and  $^{13}\text{C}$  cross polarization (CP)-MAS solid-state NMR spectra were recorded on a Bruker Avance III 500 MHz spectrometer with a conventional double resonance 4 mm CP-MAS probe operating respectively at 500 MHz for  $^1\text{H}$  and 125 MHz for  $^{13}\text{C}$ . The samples were introduced under Ar in a zirconia rotor, which was then tightly closed. In all experiments, the rotation frequency was set to ca. 10 kHz. For cross polarization experiments the contact time was set to 2 ms. Chemical shifts are given with respect to TMS as external references for  $^1\text{H}$  and  $^{13}\text{C}$  NMR (0 ppm).

### **TEM microscopy**

All samples for TEM analysis were prepared under air by directly dipping the TEM grids into the powder samples to avoid the use of any solvent associated with the risk of aggregating or leaching of the nanoparticles. A Philips CM120 Transmission Electron Microscope was used at the Centre Technologique des Microstructures Université Lyon 1, the acceleration voltage was set to 120 kV.

### **Direct Reflectance Infrared Fourier Transform Spectroscopy (DRIFT).**

Infrared spectra were recorded on a Nicolet Magna 550 FT spectrometer using a custom infrared cell equipped with  $\text{CaF}_2$  windows, allowing in situ studies. Typically, 64 scans were accumulated for each spectrum (resolution  $4\text{ cm}^{-1}$ ). The reflectance measurements were refined according to the Kubelka-Munk theory for enhanced resolution. Samples are loaded under argon in a glove box.

## B. Single Crystal X-Ray diffraction

**Table S-1.**

|                                                                                         | (COD)Pt(Me)(OSi(O <i>t</i> Bu) <sub>3</sub> )<br>(2) | (COD)Pt(OSi(O <i>t</i> Bu) <sub>3</sub> )(N(SiMe) <sub>3</sub> )<br>(3) |            |
|-----------------------------------------------------------------------------------------|------------------------------------------------------|-------------------------------------------------------------------------|------------|
| Formula                                                                                 | C <sub>21</sub> H <sub>42</sub> PtO <sub>4</sub> Si  | C <sub>26</sub> H <sub>57</sub> NPtO <sub>4</sub> Si <sub>3</sub>       |            |
| Formula weight (g.mol <sup>-1</sup> )                                                   | 581.74                                               | 727.09                                                                  |            |
| Crystal size (mm)                                                                       | 0.38x0.21x0.13                                       | 0.63x0.53x0.45                                                          |            |
| Color, morphology                                                                       | coloreless                                           | light yellow                                                            |            |
| ρ (g.cm <sup>-3</sup> )                                                                 | 1.563                                                | 1.452                                                                   |            |
| Lattice type, crystal system                                                            | Monoclinic                                           | Triclinic                                                               |            |
| Space group                                                                             | <i>P</i> 2 <sub>1</sub> / <i>n</i>                   | <i>P</i> -1                                                             |            |
| Z                                                                                       | 2                                                    | 2                                                                       |            |
| Cell constant                                                                           |                                                      |                                                                         |            |
|                                                                                         | a (Å)                                                | 9.465(1)                                                                | 10.5195(5) |
|                                                                                         | b (Å)                                                | 8.6144(9)                                                               | 11.5936(6) |
|                                                                                         | c (Å)                                                | 30.436(3)                                                               | 14.5167(8) |
|                                                                                         | α (°)                                                | 90                                                                      | 72.425(5)  |
|                                                                                         | β (°)                                                | 95.187(9)                                                               | 80.632(4)  |
|                                                                                         | γ (°)                                                | 90                                                                      | 89.822(4)  |
|                                                                                         | V (Å <sup>3</sup> )                                  | 2471.4(4)                                                               | 1663.3(2)  |
| F <sub>000</sub>                                                                        | 1168                                                 | 744                                                                     |            |
| μ (Mo Kα) (mm <sup>-1</sup> )                                                           | 5.75                                                 | 4.36                                                                    |            |
| θ (°)                                                                                   | 3.6-29.5                                             | 3.5-29.5                                                                |            |
| Scan type                                                                               | ω scans                                              | ω scans                                                                 |            |
| Temperature (K)                                                                         | 150                                                  | 150                                                                     |            |
| Measured reflections                                                                    | 22806                                                | 43516                                                                   |            |
| Refinement                                                                              | full least-square matrix on <i>F</i> <sup>2</sup>    | full least-square matrix on <i>F</i> <sup>2</sup>                       |            |
| Independent relections                                                                  | 6069                                                 | 8476                                                                    |            |
| No. Parameters                                                                          | 244                                                  | 317                                                                     |            |
| <i>R</i> [ <i>F</i> <sup>2</sup> > 2σ( <i>F</i> <sup>2</sup> )]/ <i>wR</i> <sub>2</sub> | 0.047/ 0.149                                         | 0.031/ 0.066                                                            |            |
| GoF                                                                                     | 0.99                                                 | 1                                                                       |            |
| Max peak in final diff. map<br>(e- Å <sup>-3</sup> )                                    | 2.09                                                 | 1.86                                                                    |            |
| Min peak in final diff. map<br>(e- Å <sup>-3</sup> )                                    | -3.57                                                | -1.76                                                                   |            |

### C. (COD)Pt(Me)<sub>2</sub>

Figure S1. IR-DRIFT

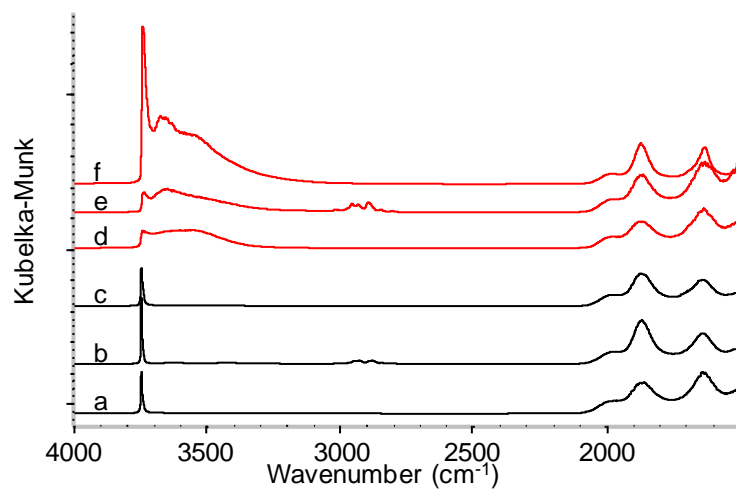

a) SiO<sub>2-700</sub>, b) (COD)Pt(Me)<sub>2</sub>@SiO<sub>2-700</sub>, c) after static H<sub>2</sub> treatment, d) SiO<sub>2-200</sub>, e)  
(COD)Pt(Me)<sub>2</sub>@SiO<sub>2-200</sub>, f) after static H<sub>2</sub> treatment

|                      | grafted                            | after H <sub>2</sub> |
|----------------------|------------------------------------|----------------------|
| SiO <sub>2-700</sub> | 3057/3001/2945/2927/2877/2842/2801 | -                    |
| SiO <sub>2-200</sub> | 3018/3005/2955/2930/2894/2648/2802 | -                    |

**Figure S2.**

**Solid-state NMR of (COD)Pt(Me)<sub>2</sub>@SiO<sub>2</sub>-200**

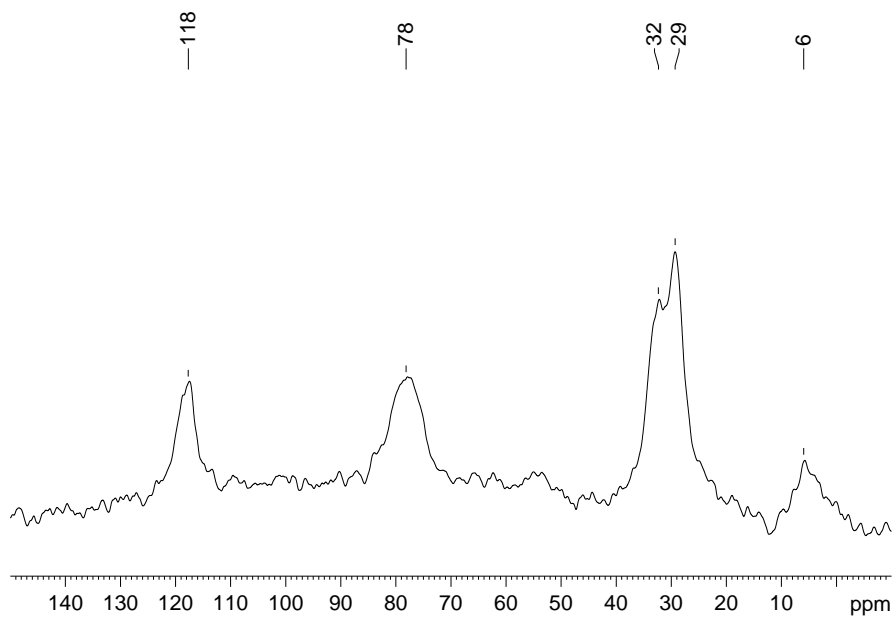

<sup>13</sup>C CP/MAS solid state NMR spectra of (COD)Pt(Me)<sub>2</sub>@SiO<sub>2</sub>-200 (d1 = 6 s, 10484 scans,  
lb=100Hz)

**Solid-state NMR of (COD)Pt(Me)<sub>2</sub>@SiO<sub>2</sub>-700**

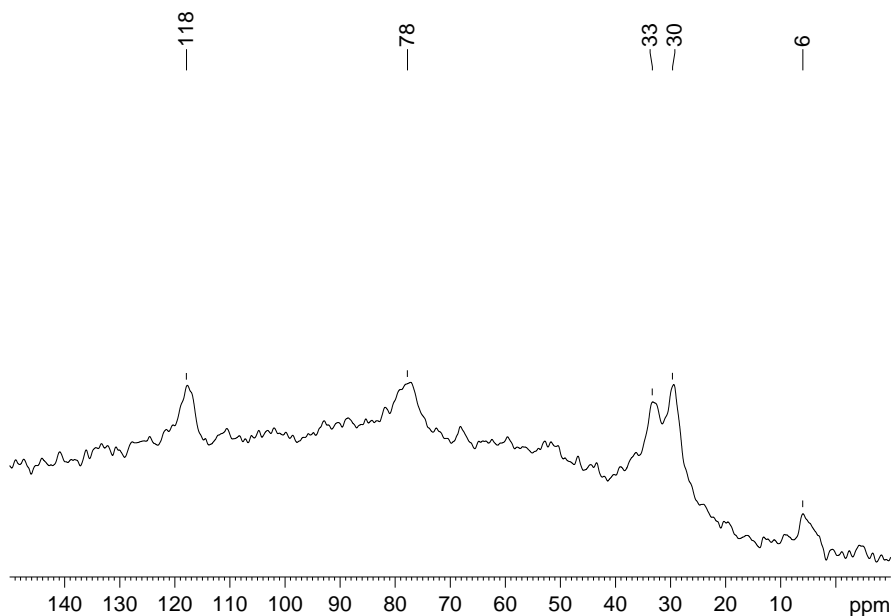

<sup>13</sup>C CP/MAS solid state NMR spectra of (COD)Pt(Me)<sub>2</sub>@SiO<sub>2</sub>-700 (d1 = 4 s, 33702 scans,  
lb=100Hz)

**Solid-state NMR of (COD)Pt(Me)<sub>2</sub> mixed in the solid state with SiO<sub>2</sub>-700**

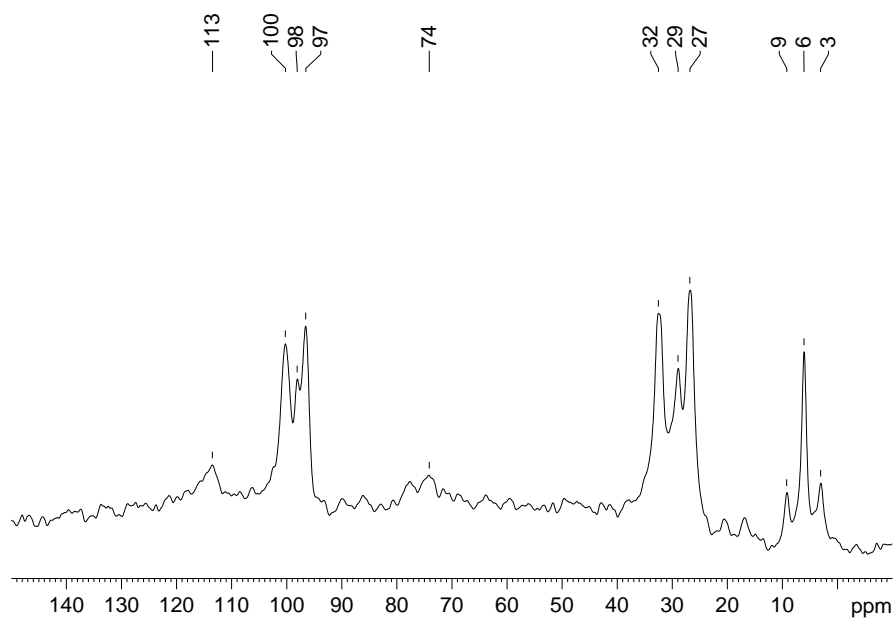

$^{13}\text{C}$  CP/MAS solid state NMR spectra of  $(\text{COD})\text{Pt}(\text{Me})_2 + \text{SiO}_{2-700}$  ( $d_1 = 2$  s, 3433 scans,  
 $l_b = 100\text{Hz}$ )

**Figure S3. TEM**

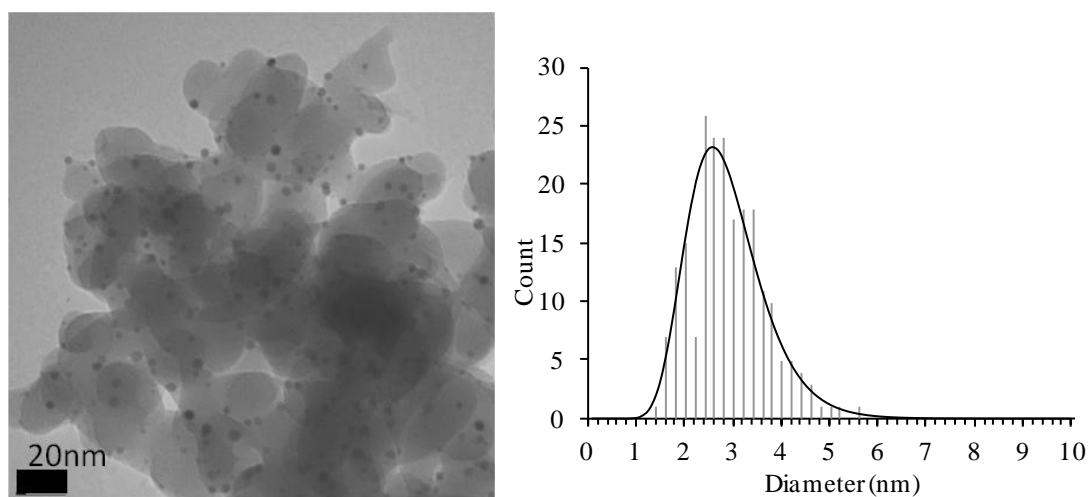

(COD)Pt(Me)<sub>2</sub>@SiO<sub>2-200</sub> treated under static H<sub>2</sub> atmosphere. 170 nanoparticles count. Mean size 3.0 ( $\sigma=0.7$ ) nm.

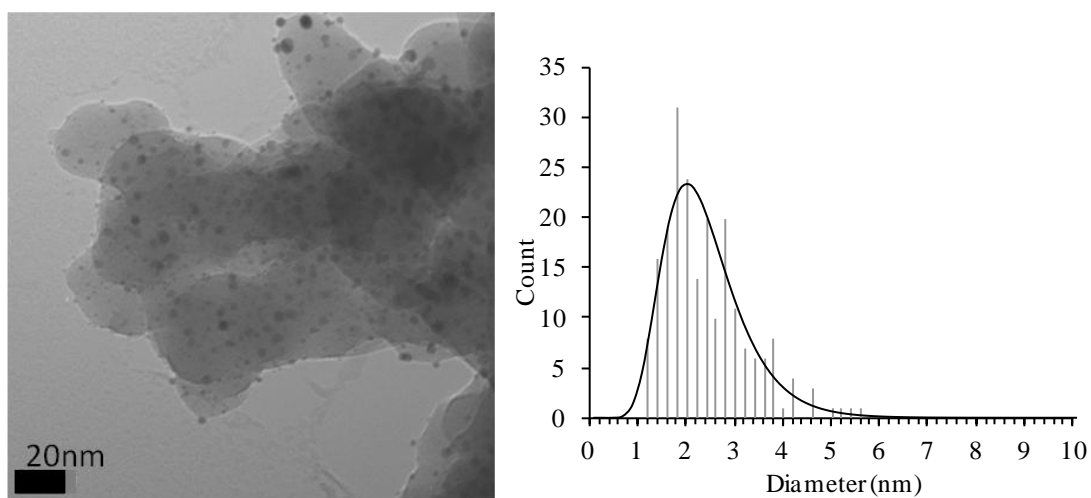

(COD)Pt(Me)<sub>2</sub>@SiO<sub>2-700</sub> treated under static H<sub>2</sub> atmosphere. 212 nanoparticles count. Mean size 2.4 ( $\sigma=0.9$ ) nm.

## D. (COD)Pt(OSi(OtBu)<sub>3</sub>)<sub>2</sub>

Figure S4. IR-DRIFT

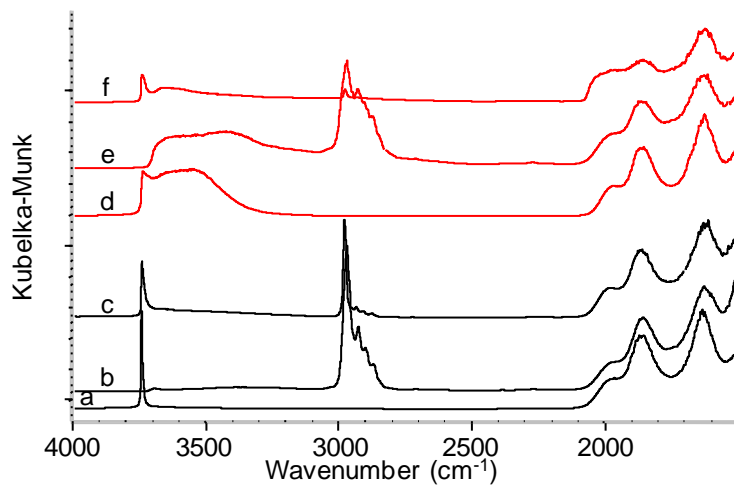

a) SiO<sub>2-700</sub>, b) (COD)Pt(OSi(OtBu)<sub>3</sub>)<sub>2</sub>@SiO<sub>2-700</sub>, c) after static H<sub>2</sub> treatment, d) SiO<sub>2-200</sub>, e) (COD)Pt(OSi(OtBu)<sub>3</sub>)<sub>2</sub>@SiO<sub>2-200</sub>, f) after static H<sub>2</sub> treatment

|                      | grafted                       | after H <sub>2</sub>     |
|----------------------|-------------------------------|--------------------------|
| SiO <sub>2-700</sub> | 3370/2975/2933/2905/2876      | 2982/2955/2938/2913/2880 |
| SiO <sub>2-200</sub> | 3420/2975/2931/2905/2876/2850 | 2984/2040                |



**Figure S5.**

**Solid-state NMR of (COD)Pt(OSi(OtBu)<sub>3</sub>)<sub>2</sub>@SiO<sub>2-200</sub>**

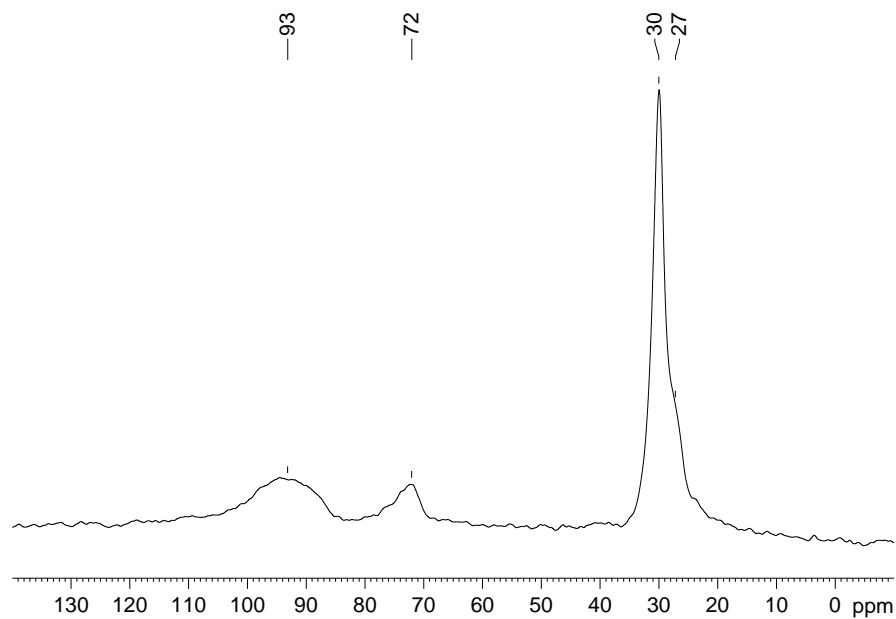

<sup>13</sup>C CP/MAS solid state NMR spectra of (COD)Pt(OSi(OtBu)<sub>3</sub>)<sub>2</sub>@SiO<sub>2-200</sub> (d1 = 4 s, 12766 scans, lb=100Hz)

**Solid-state NMR of (COD)Pt(OSi(OtBu)<sub>3</sub>)<sub>2</sub>@SiO<sub>2-700</sub>**

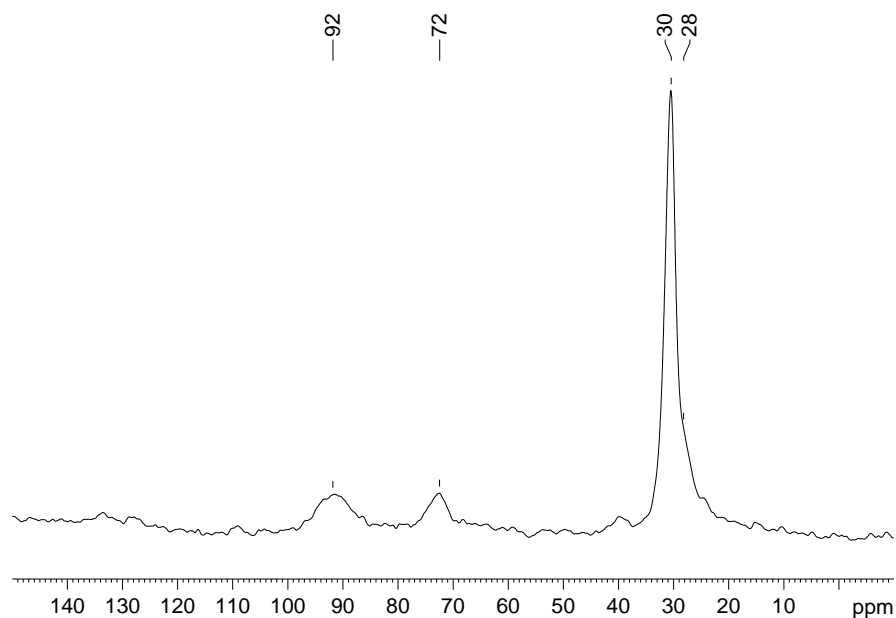

<sup>13</sup>C CP/MAS solid state NMR spectra of (COD)Pt(OSi(OtBu)<sub>3</sub>)<sub>2</sub>@SiO<sub>2-700</sub> (d1 = 2 s, 2618 scans, lb=50Hz)

**Figure S6. TEM**

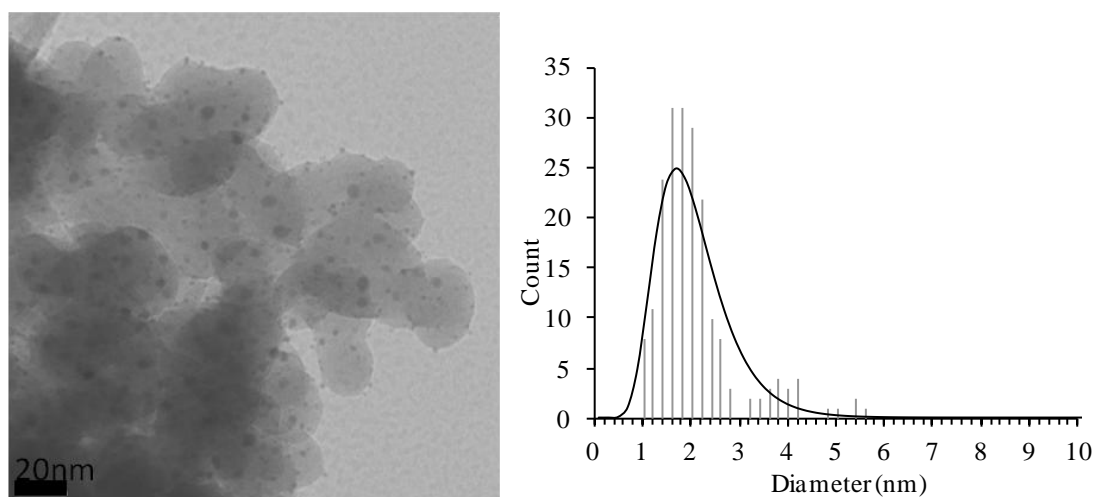

(COD)Pt(OSi(OtBu)<sub>3</sub>)<sub>2</sub>@SiO<sub>2-200</sub> treated under static H<sub>2</sub> atmosphere. 200 nanoparticles count.

Mean size 2.1 ( $\sigma=0.9$ ) nm.

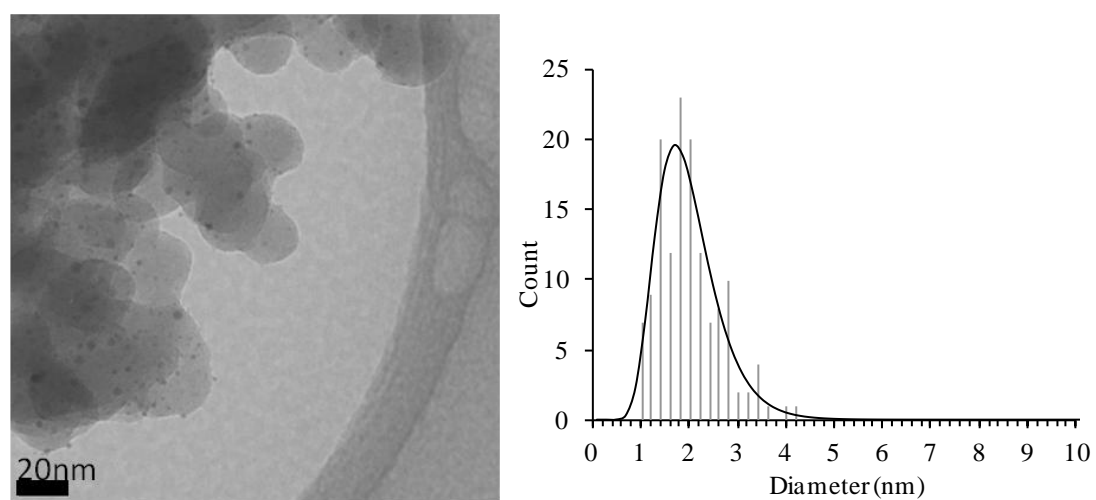

(COD)Pt(OSi(OtBu)<sub>3</sub>)<sub>2</sub>@SiO<sub>2-700</sub> treated under static H<sub>2</sub> atmosphere. 200 nanoparticles count.

Mean size 2.0 ( $\sigma=0.6$ ) nm.

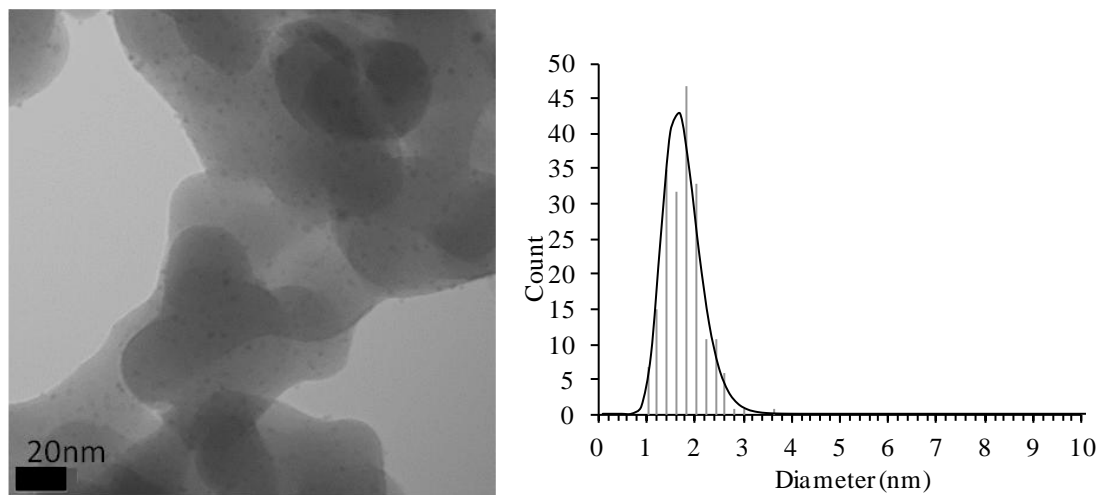

(COD)Pt(OSi(OtBu)<sub>3</sub>)<sub>2</sub>@SiO<sub>2-700</sub> treated under H<sub>2</sub> flow. 200 nanoparticles count. Mean size

1.8 ( $\sigma=0.4$ ) nm.

### E. (COD)Pt(Me)(OSi(OtBu)<sub>3</sub>)

Figure S7.

Liquid NMR of 2 (COD)Pt(Me)(OSi(OtBu)<sub>3</sub>) in C<sub>6</sub>D<sub>6</sub>.

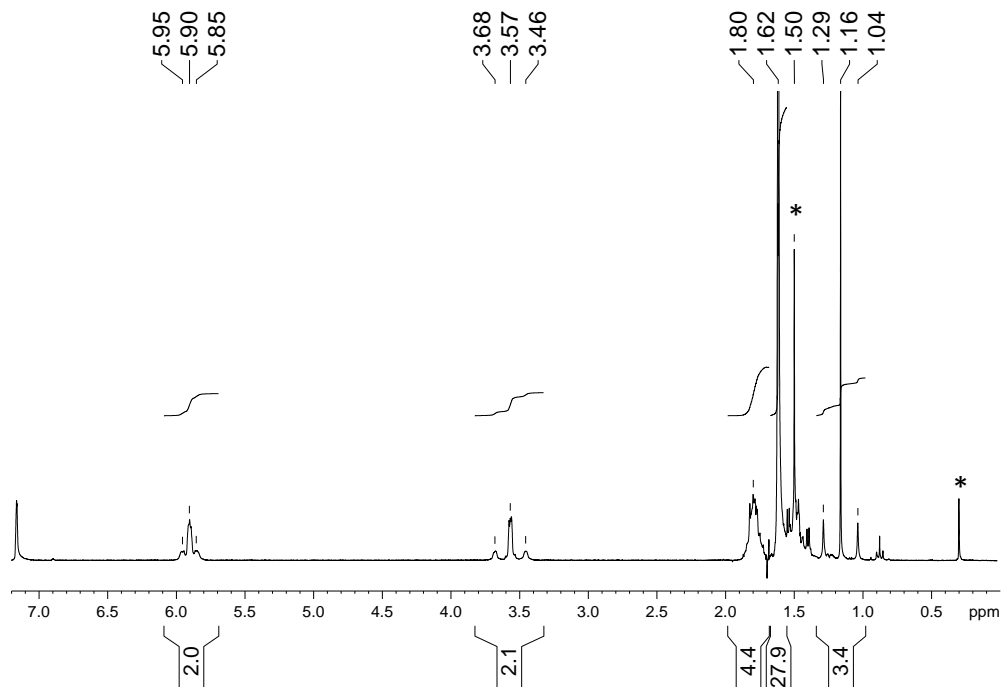

<sup>1</sup>H NMR, d1=1sec, 8 scans.

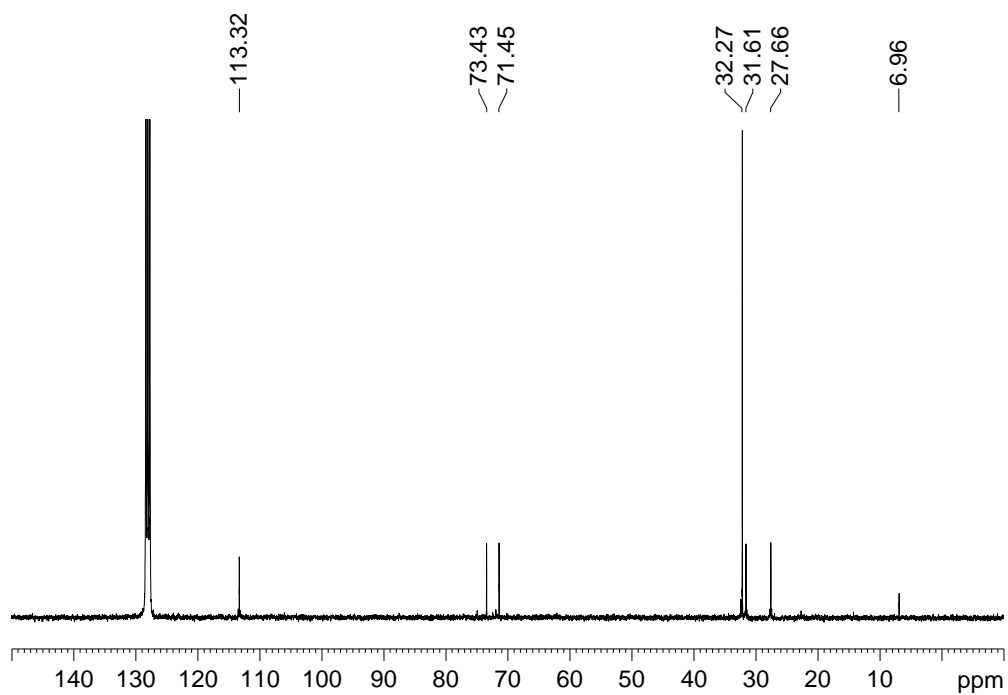

<sup>13</sup>C NMR in C<sub>6</sub>D<sub>6</sub>, d1=1sec, 17709 scans

$^1\text{H}$  NMR ( $\text{C}_6\text{D}_6$ ;  $\delta$ , ppm): 1.16 (t, 3H,  $\text{CH}_3$ , JPt-H=75Hz), 1.50 (m, 4H, endo  $\text{CH}_2$ ), 1.62 (s, 27H,  $\text{OCMe}_3$ ), 1.80 (m, 4H, exo  $\text{CH}_2$ ), 3.57 (t, 2H, =CH, trans to OSi, JPt-H=66 Hz), 5.90 (t, 2H, =CH, trans to  $\text{CH}_3$ , JPt-H=30Hz).

$^{13}\text{C}$  NMR ( $\text{C}_6\text{D}_6$ ;  $\delta$ , ppm): 6.9 (s,  $\text{CH}_3$ , JPt-C=700 Hz), 27.6 (s,  $\text{CH}_2$ ), 31.6 (s,  $\text{CH}_2$ ), 32.2 (s,  $\text{OCMe}_3$ ), 71.4 (s,  $\text{OCMe}_3$ ), 73.4 (s, =CH, trans to OSi, JPt-C=227 Hz), 113.3 (s, =CH, trans to  $\text{CH}_3$ , JPt-C=26.5 Hz).

Figure S8. IR-DRIFT

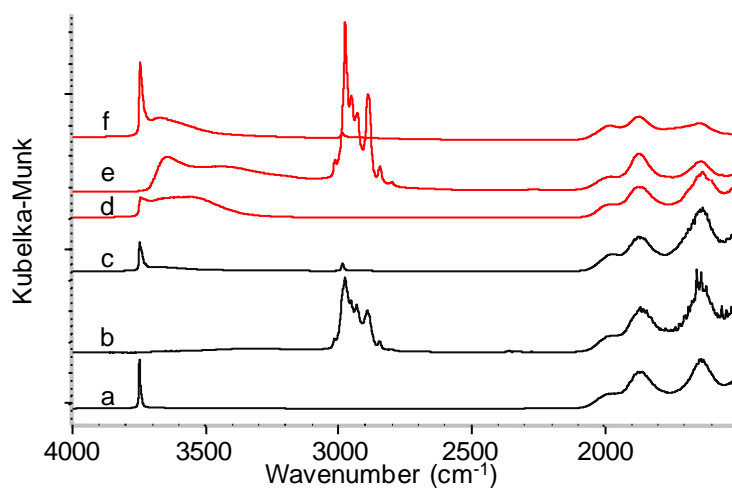

a)  $\text{SiO}_2$ -700, b)  $(\text{COD})\text{Pt}(\text{Me})(\text{OSi}(\text{OtBu})_3)@\text{SiO}_2$ -700, c) after static  $\text{H}_2$  treatment, d)  $\text{SiO}_2$ -200, e)  $(\text{COD})\text{Pt}(\text{Me})(\text{OSi}(\text{OtBu})_3)@\text{SiO}_2$ -200, f) after static  $\text{H}_2$  treatment

|                     | grafted                                 | after $\text{H}_2$ |
|---------------------|-----------------------------------------|--------------------|
| $\text{SiO}_2$ -700 | 3015/2977/2954/2932/2893/2888/2846/2800 | 2983               |
| $\text{SiO}_2$ -200 | 3413/3013/2975/2951/2928/2890/2844/2801 | 2984               |

**Figure S9.**

**Solid-state NMR of (COD)Pt(Me)(OSi(OtBu)<sub>3</sub>)@SiO<sub>2-200</sub>**

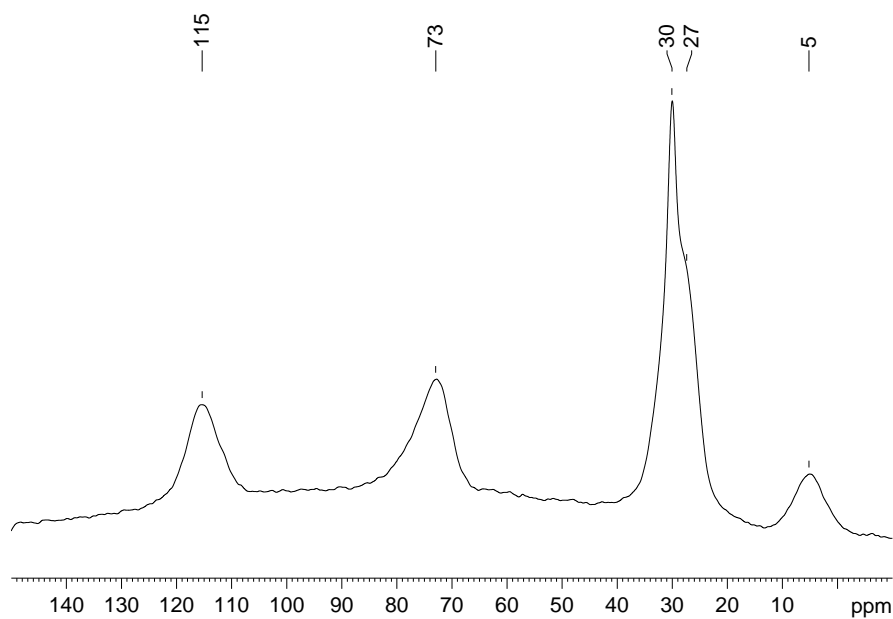

<sup>13</sup>C CP/MAS solid state NMR spectra of (COD)Pt(Me)(OSi(OtBu)<sub>3</sub>)@SiO<sub>2-200</sub> (d1 = 2 s,  
100000 scans, lb=100Hz)

**Solid-state NMR of CODPt(Me)(OSi(OtBu)<sub>3</sub>)@SiO<sub>2-700</sub>**

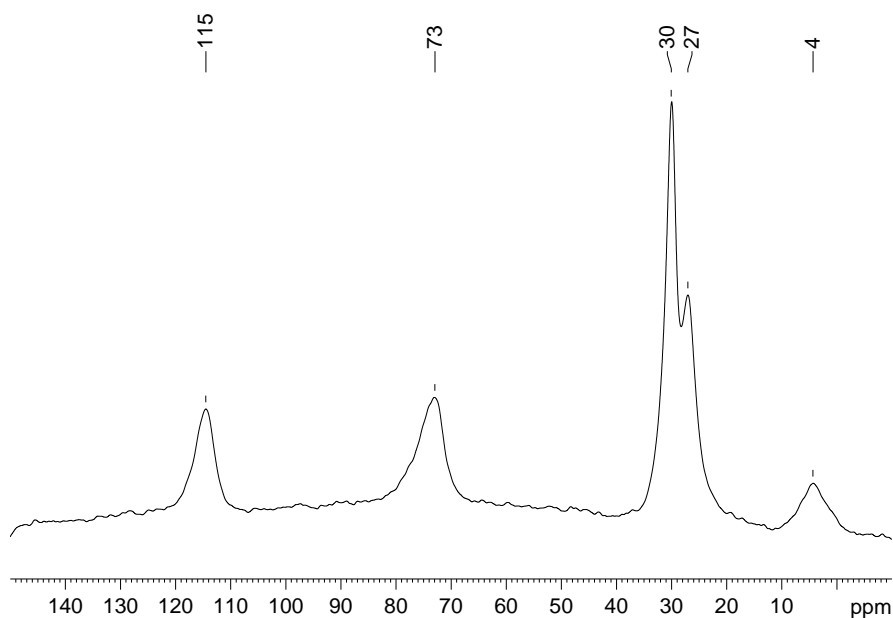

<sup>13</sup>C CP/MAS solid state NMR spectra of (COD)Pt(Me)(OSi(OtBu)<sub>3</sub>)@SiO<sub>2-700</sub> (d1 = 6 s,  
38069 scans, lb=100Hz)

**Figure S10. TEM**

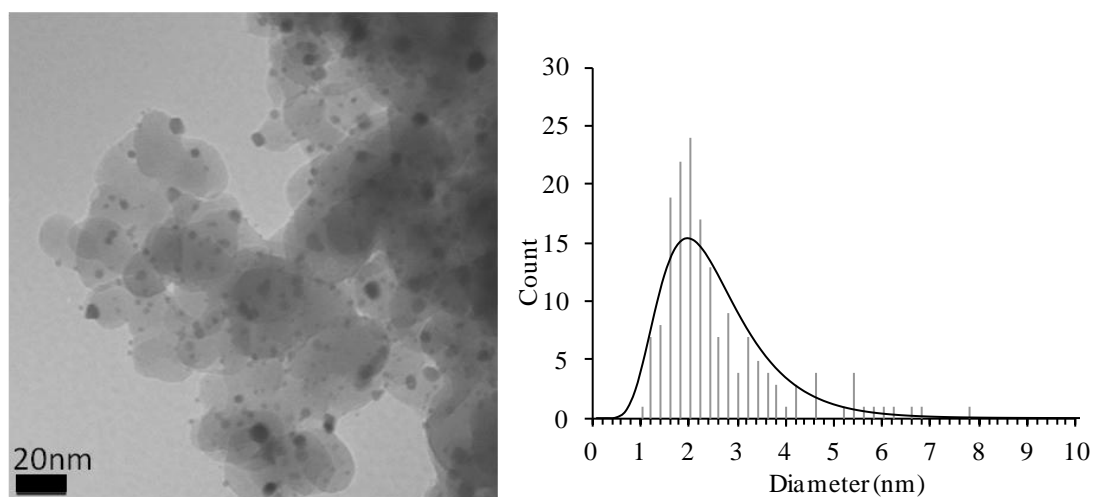

(COD)Pt(Me)((OSi(OtBu)<sub>3</sub>)@SiO<sub>2-200</sub> treated under static H<sub>2</sub>. 170 nanoparticles count. Mean size 2.6 ( $\sigma=1.2$ ) nm.

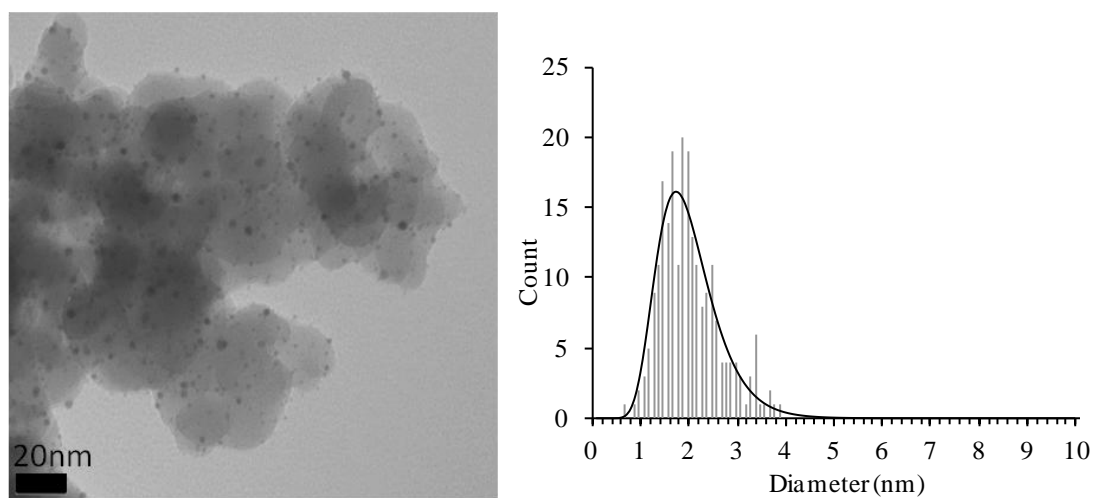

(COD)Pt(Me)(OSi(OtBu)<sub>3</sub>)/SiO<sub>2-700</sub> treated under static H<sub>2</sub>. 226 nanoparticles count. Mean size 2.0 ( $\sigma=0.6$ ) nm.

## F. (COD)Pt(Me)N(SiMe<sub>3</sub>)<sub>2</sub>

Figure S11. Liquid NMR of 1 (COD)Pt(Me)N(SiMe<sub>3</sub>)<sub>2</sub> in C<sub>6</sub>D<sub>6</sub>.

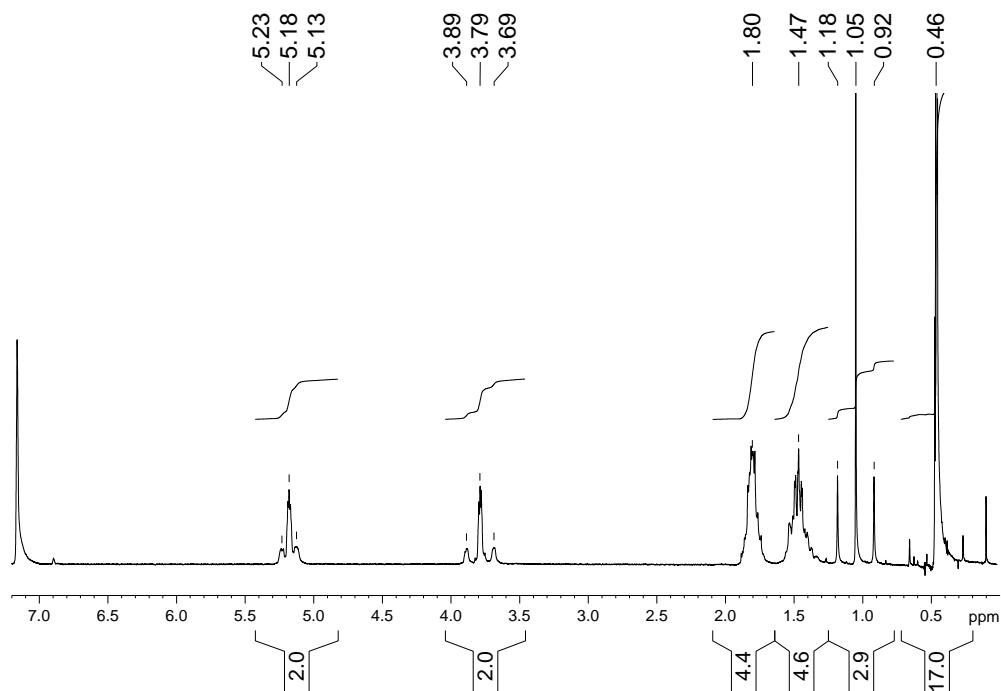

<sup>1</sup>H NMR, d1=1sec, 8 scans.

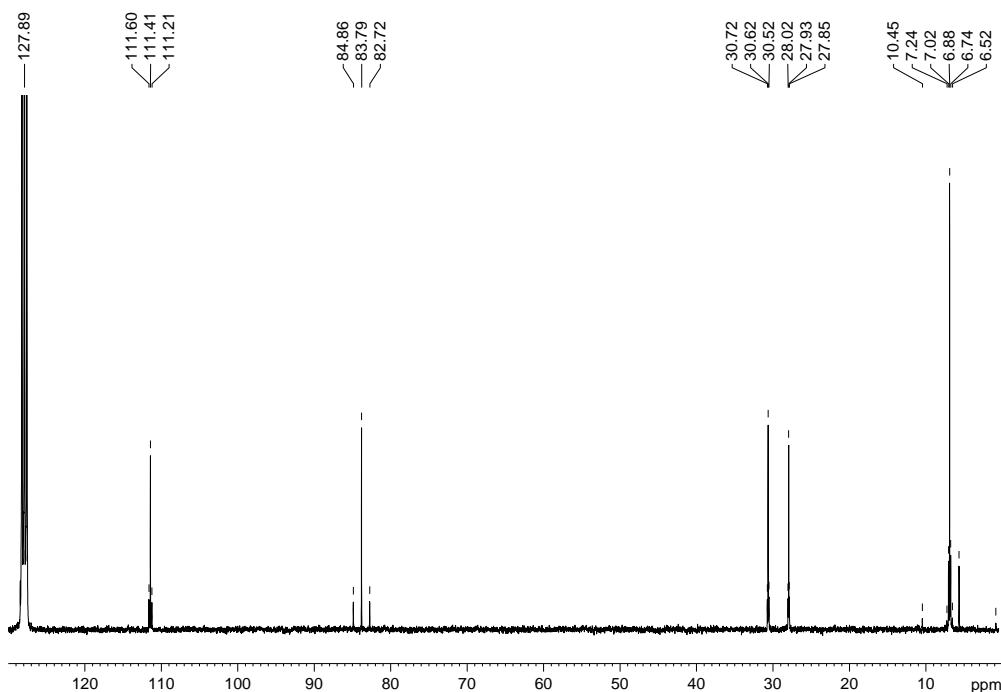

<sup>13</sup>C NMR, d1=1sec, 10000 scans

<sup>1</sup>H NMR (C<sub>6</sub>D<sub>6</sub>; δ, ppm): 0.46 (s, 18H, -SiMe<sub>3</sub>), 1.05 (t, 3H, Pt-CH<sub>3</sub>, J<sub>Pt-H</sub>=80Hz), 1.47 (m, 4H, endo CH<sub>2</sub>), 1.80 (m, 4H, exo CH<sub>2</sub>), 3.79 (t, 2H, =CH, trans to N, J<sub>Pt-H</sub>=60 Hz), 5.18 (t, 2H, =CH, trans to CH<sub>3</sub>, J<sub>Pt-H</sub>=30Hz).



$^{13}\text{C}$  NMR ( $\text{C}_6\text{D}_6$ ;  $\delta$ , ppm): 5.8 (t,  $\text{CH}_3$ , Me,  $J_{\text{Pt-C}}=726.8$  Hz), 6.8 (m,  $\text{SiCH}_3$ ), 28.1 (t,  $\text{CH}_2$ ,  $J_{\text{Pt-C}}=12.9$  Hz), 30.8 (t,  $\text{CH}_2$ ,  $J_{\text{Pt-C}}=15.9$  Hz), 83.9 (t,  $=\text{CH}$ , trans to N,  $J_{\text{Pt-C}}=161.3$  Hz), 111.6 (s,  $=\text{CH}$ , trans to  $\text{CH}_3$ ,  $J_{\text{Pt-C}}=29.4$  Hz).

**Figure S12. IR-DRIFT**

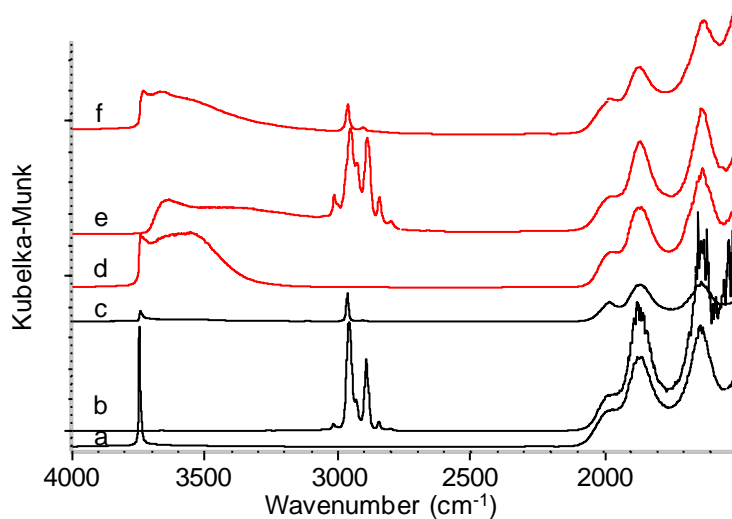

a)  $\text{SiO}_{2-700}$ , b)  $(\text{COD})\text{Pt}(\text{Me})(\text{N}(\text{SiMe}_3)_2)@\text{SiO}_{2-700}$ , c) after static  $\text{H}_2$  treatment, d)  $\text{SiO}_{2-200}$ ,  
e)  $(\text{COD})\text{Pt}(\text{Me})(\text{N}(\text{SiMe}_3)_2)@\text{SiO}_{2-200}$ , f) after static  $\text{H}_2$  treatment

|                      | grafted                                 | after $\text{H}_2$   |
|----------------------|-----------------------------------------|----------------------|
| $\text{SiO}_{2-700}$ | 3017/3002/2962/2957/2932/2895/2846/2802 | 3747/2966//2907/1980 |
| $\text{SiO}_{2-200}$ | 3014/3000/2954/2927/2890/2844/2796      | 2965/2905/1982       |

**Figure S13.**

**Solid-state NMR of (COD)Pt(Me)(N(SiMe<sub>3</sub>)<sub>2</sub>)@SiO<sub>2-200</sub>**

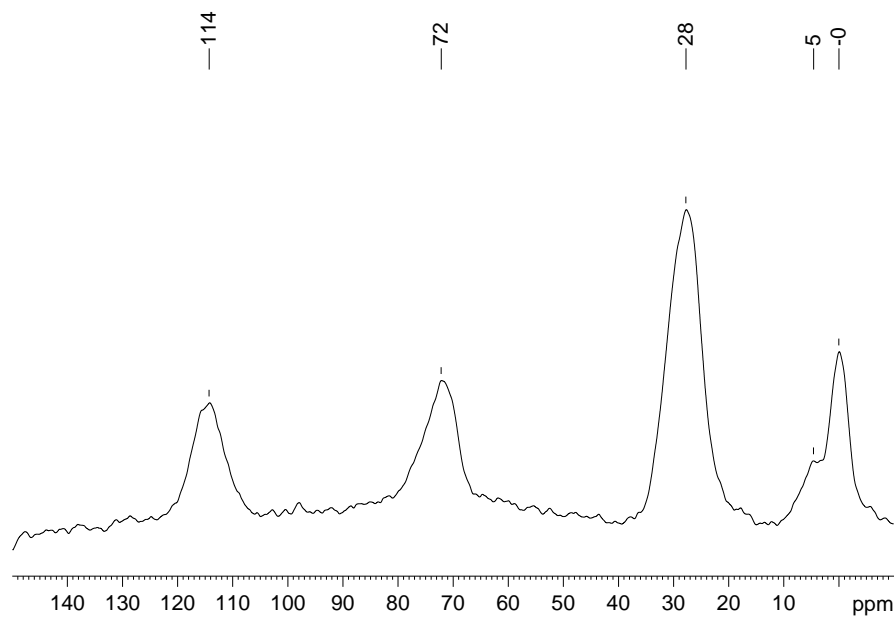

<sup>13</sup>C CP/MAS solid state NMR spectra of (COD)Pt(Me)(N(SiMe<sub>3</sub>)<sub>2</sub>)/SiO<sub>2-(200)</sub> (d1 = 2 s, 26482 scans, lb=100Hz)

**Solid-state NMR of (COD)Pt(Me)N(SiMe<sub>3</sub>)<sub>2</sub>@SiO<sub>2-700</sub>**

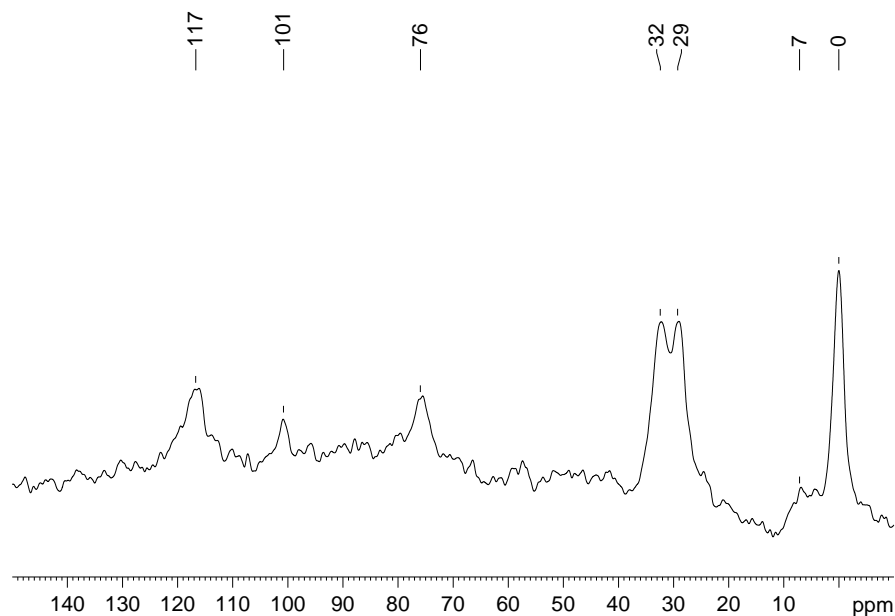

<sup>13</sup>C CP/MAS solid state NMR spectra of (COD)Pt(Me)(N(SiMe<sub>3</sub>)<sub>2</sub>)@SiO<sub>2-700</sub> (d1 = 2 s, 10379 scans, lb=100Hz)

**Figure S14. TEM**

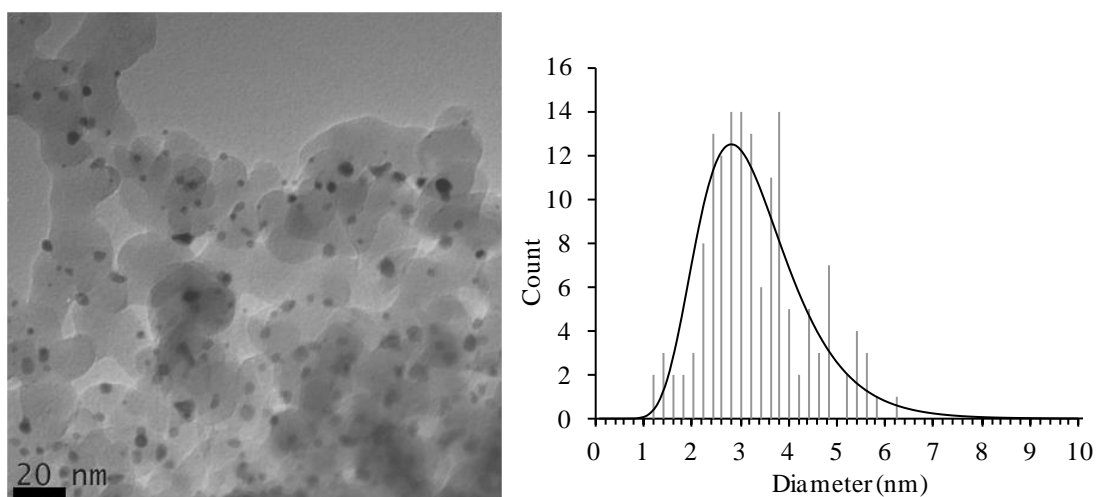

(COD)Pt(Me)(N(SiMe<sub>3</sub>)<sub>2</sub>)@SiO<sub>2-200</sub> treated under static H<sub>2</sub>. 150 nanoparticles count. Mean size 3.3 ( $\sigma=1.0$ ) nm.

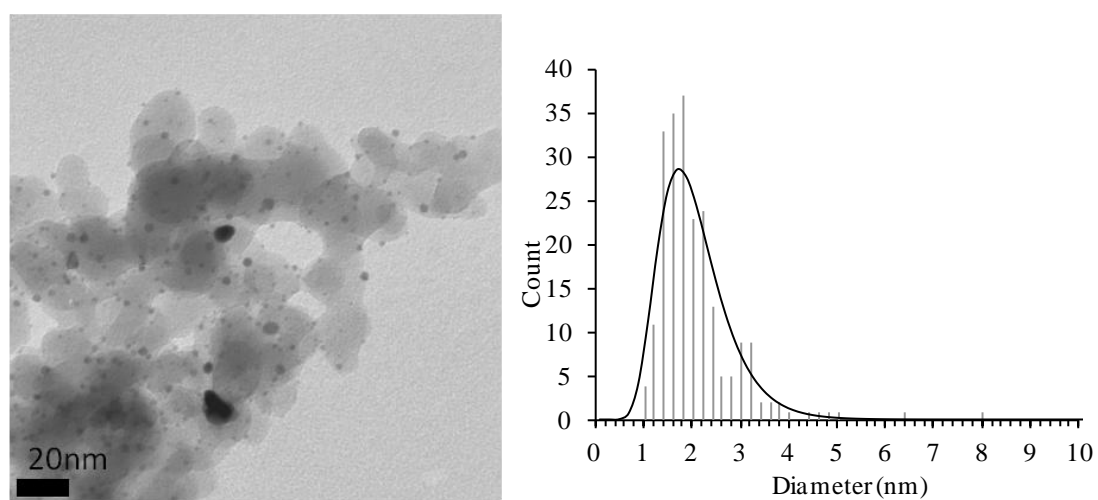

(COD)Pt(Me)(N(SiMe<sub>3</sub>)<sub>2</sub>)@SiO<sub>2-700</sub> treated under static H<sub>2</sub> atmosphere. 221 nanoparticles count. Mean size 2.1 ( $\sigma=0.9$ ) nm.

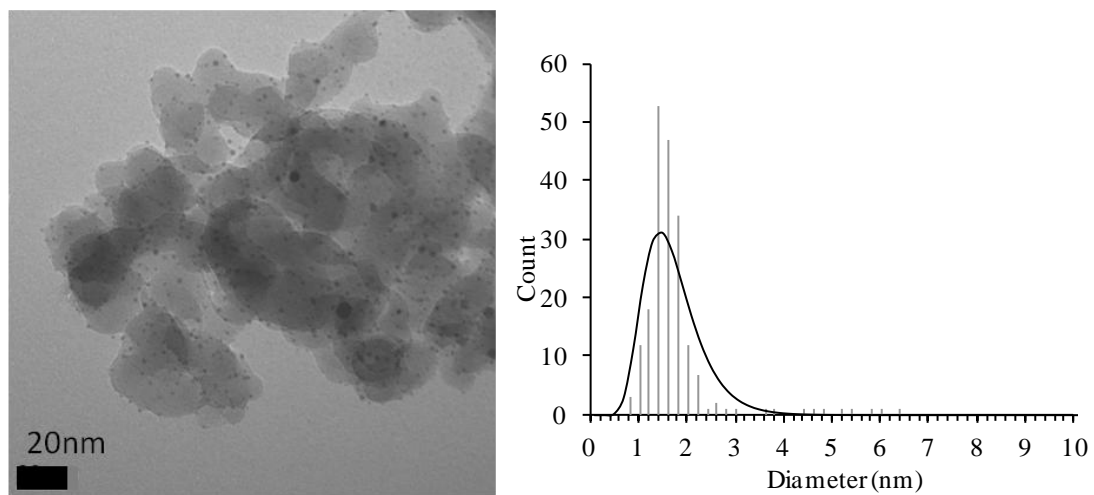

(COD)Pt(Me)(N(SiMe<sub>3</sub>)<sub>2</sub>)@SiO<sub>2-700</sub> treated under H<sub>2</sub> flow. 221 nanoparticles count. Mean size 1.7 ( $\sigma=0.8$ ) nm.

## G. (COD)Pt(Cl)(N(SiMe<sub>3</sub>)<sub>2</sub>)

Figure S15. IR-DRIFT

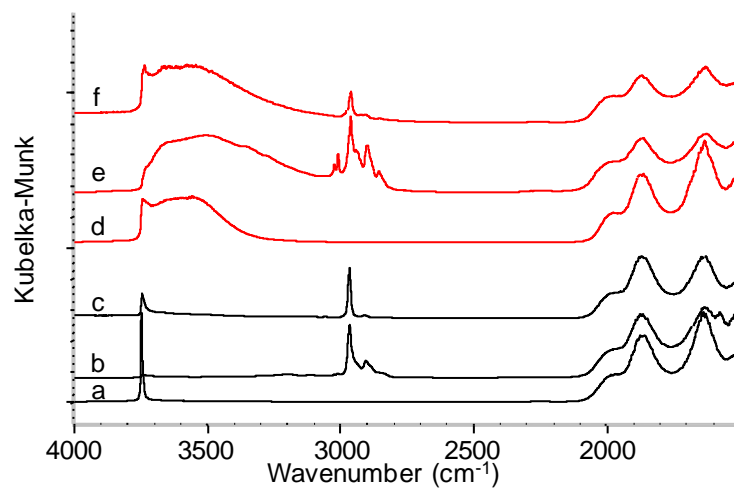

a) SiO<sub>2-700</sub>, b) (COD)Pt(Cl)(N(SiMe<sub>3</sub>)<sub>2</sub>)@SiO<sub>2-700</sub>, c) after static H<sub>2</sub> treatment, d) SiO<sub>2-200</sub>,  
e) (COD)Pt(Cl)(N(SiMe<sub>3</sub>)<sub>2</sub>)@SiO<sub>2-200</sub>, f) after static H<sub>2</sub> treatment

|                      | grafted                            | after H <sub>2</sub> |
|----------------------|------------------------------------|----------------------|
| SiO <sub>2-700</sub> | 3022/3008/2964/2934/2902/2888      | 2966/2907            |
| SiO <sub>2-200</sub> | 3023/3009/2962/2942/2934/2900/2853 | 2964/2907            |

**Figure S16.**

**Solid-state NMR of (COD)Pt(Cl)(N(SiMe<sub>3</sub>)<sub>2</sub>)@SiO<sub>2-200</sub>**

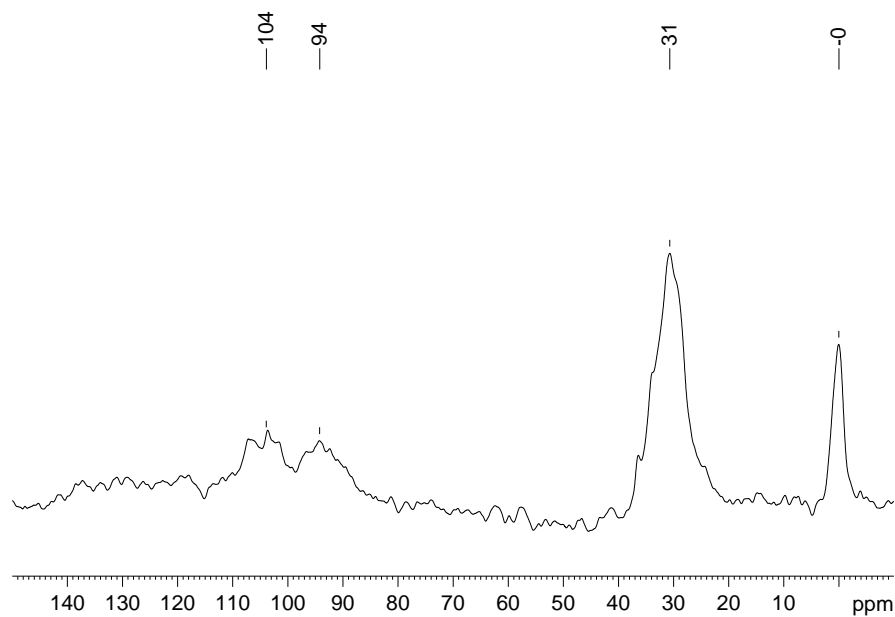

<sup>13</sup>C CP/MAS solid state NMR spectra of (COD)Pt(Cl)(N(SiMe<sub>3</sub>)<sub>2</sub>)@SiO<sub>2-200</sub> (d1 = 14 s,  
12312 scans, lb=100Hz)

**Solid-state NMR of (COD)Pt(Cl)(N(SiMe<sub>3</sub>)<sub>2</sub>)@SiO<sub>2-700</sub>**

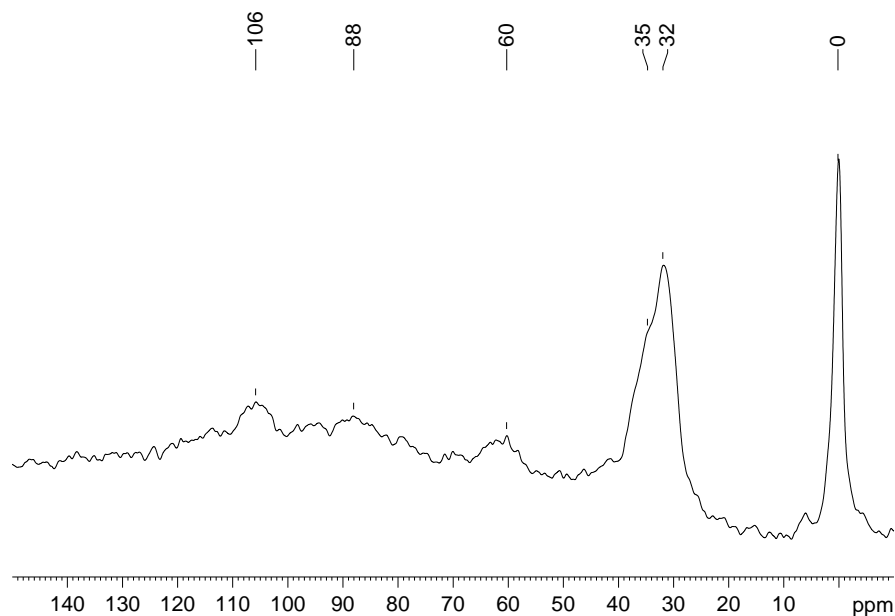

<sup>13</sup>C CP/MAS solid state NMR spectra of (COD)Pt(Cl)(N(SiMe<sub>3</sub>)<sub>2</sub>)@SiO<sub>2-700</sub> (d1 = 4 s, 39207  
scans, lb=100Hz)

Note: the additional peak at 60 ppm is attributed to physisorbed diethylether.

**Figure S17. TEM**

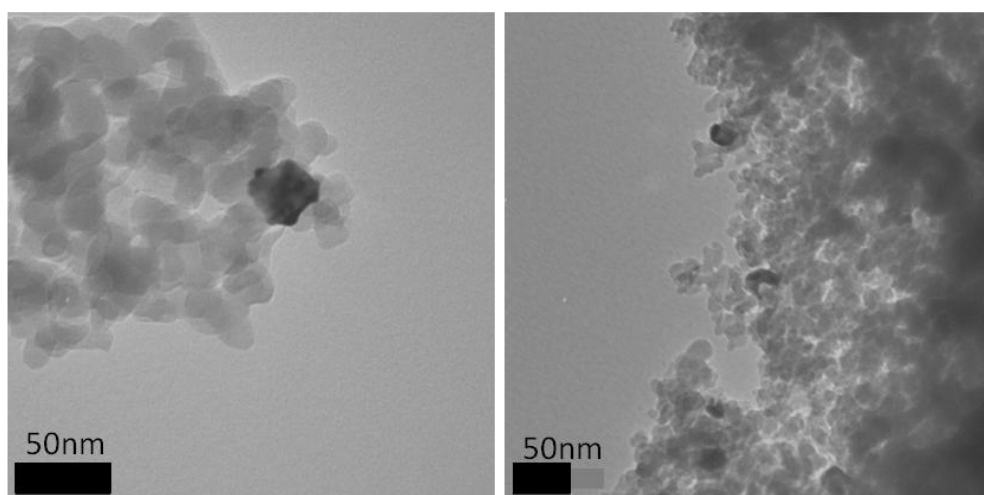

(COD)Pt(Cl)(N(SiMe<sub>3</sub>)<sub>2</sub>)@SiO<sub>2-200</sub> treated under static H<sub>2</sub> atmosphere.

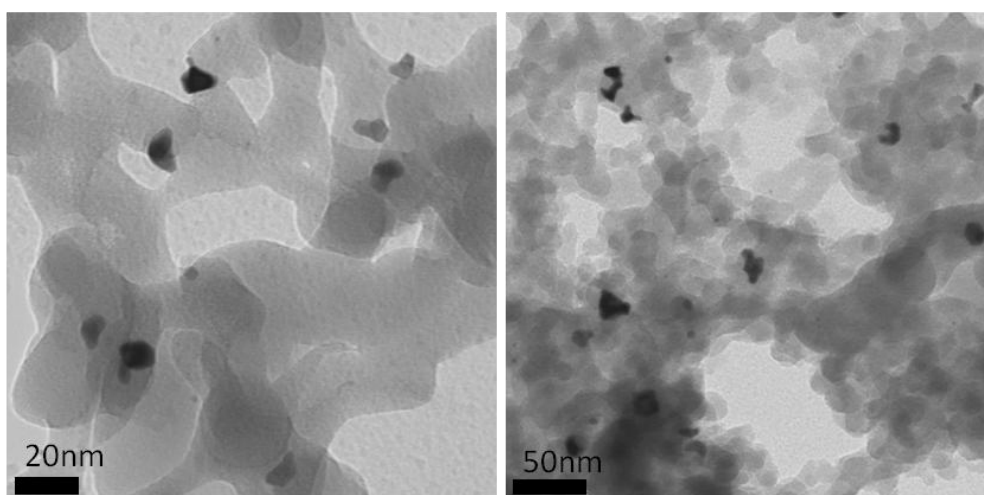

(COD)Pt(Cl)(N(SiMe<sub>3</sub>)<sub>2</sub>)@SiO<sub>2-700</sub> treated under static H<sub>2</sub> atmosphere.

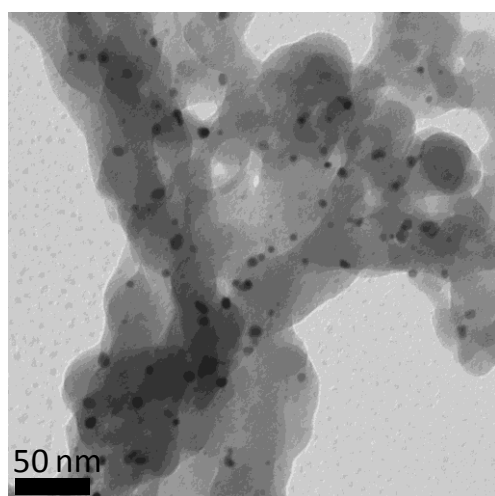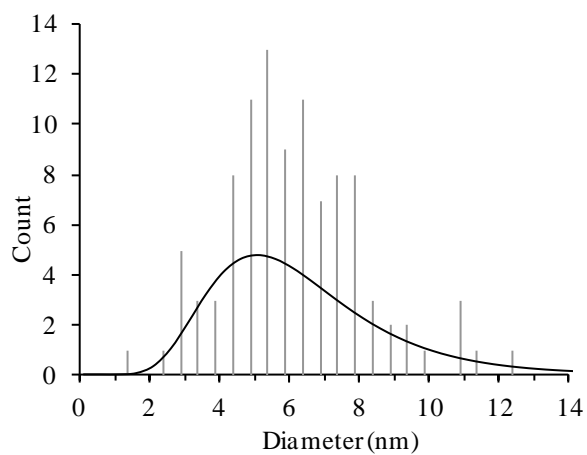

(COD)Pt(Cl)(N(SiMe<sub>3</sub>)<sub>2</sub>)@SiO<sub>2-700</sub> treated under H<sub>2</sub> flow. 103 nanoparticles count. Mean size

6.3 ( $\sigma=2.4$ ) nm.

## H. (COD)Pt(OSi(OtBu)<sub>3</sub>)(N(SiMe<sub>3</sub>)<sub>2</sub>)

Figure S18. Liquid state NMR of 3 (COD)Pt(OSi(OtBu)<sub>3</sub>)(N(SiMe<sub>3</sub>)<sub>2</sub>) in C<sub>6</sub>D<sub>6</sub>.

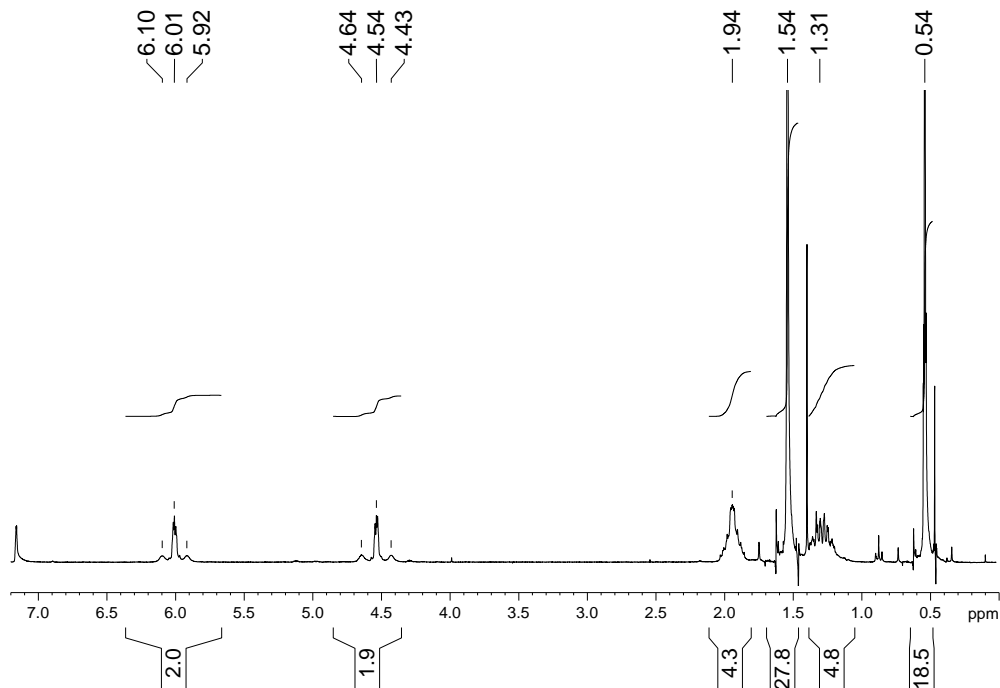

<sup>1</sup>H NMR, d1=1sec, 8 scans.

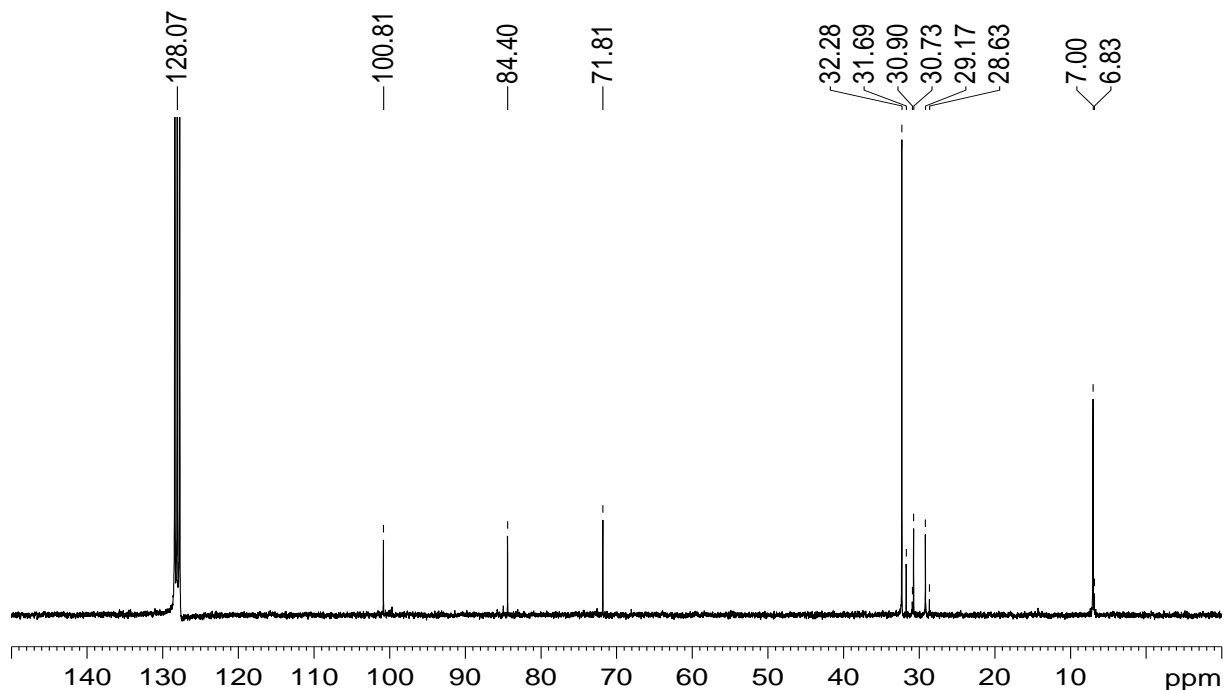

<sup>13</sup>C NMR, d1=1sec, 1875 scans.

<sup>1</sup>H NMR (C<sub>6</sub>D<sub>6</sub>; δ, ppm): 0.54 (s, 18H, -SiMe<sub>3</sub>), 1.31 (m, 4H, endo CH<sub>2</sub>), 1.54 (s, 27H, OCMe<sub>3</sub>), 1.94 (m, 4H, exo CH<sub>2</sub>), 4.55 (t, 2H, =CH, trans to OSi, J<sub>Pt-H</sub>=66 Hz), 6.01 (t, 2H, =CH, trans to N, J<sub>Pt-H</sub>=51 Hz).



$^{13}\text{C}$  NMR ( $\text{C}_6\text{D}_6$ ;  $\delta$ , ppm): 6.8 (s,  $\text{OCMe}_3$ ), 7.0 (s,  $\text{SiMe}_3$ ), 29.2 (s,  $\text{CH}_2$ ), 30.7 (s,  $\text{CH}_2$ , COD), 32.3 (s,  $\text{OCMe}_3$ ), 71.8 (s,  $\text{OCMe}_3$ ), 84.4 (s,  $=\text{CH}$ , trans to OSi), 100.8 (s,  $=\text{CH}$ , trans to N).

**Figure S19. IR-DRIFT**

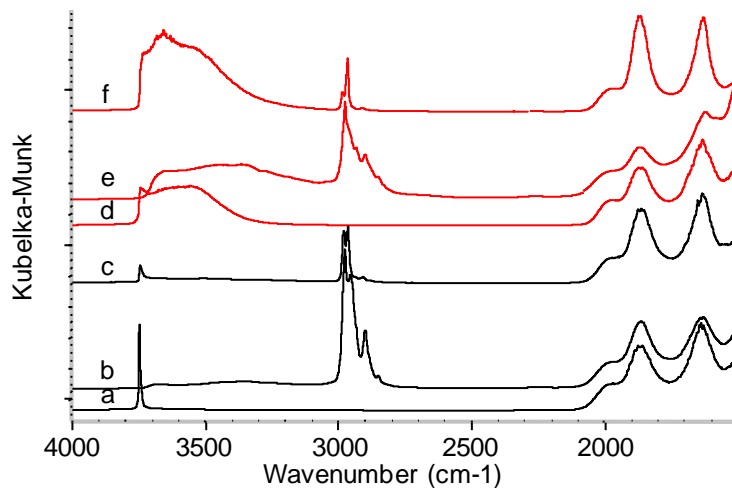

a)  $\text{SiO}_{2-700}$ , b)  $(\text{COD})\text{Pt}(\text{OSi}(\text{O}t\text{Bu})_3)(\text{N}(\text{SiMe}_3)_2)@\text{SiO}_{2-700}$ , c) after static  $\text{H}_2$  treatment, d)  $\text{SiO}_{2-200}$ , e)  $(\text{COD})\text{Pt}(\text{OSi}(\text{O}t\text{Bu})_3)(\text{N}(\text{SiMe}_3)_2)@\text{SiO}_{2-200}$ , f) after static  $\text{H}_2$  treatment

|                      | grafted                  | after $\text{H}_2$ |
|----------------------|--------------------------|--------------------|
| $\text{SiO}_{2-700}$ | 2976/2956/2951/2899/2851 | 2981/2965/2909     |
| $\text{SiO}_{2-200}$ | 2977/2958/2933/2900/2852 | 2983/2964/2906     |

**Figure S20.**

**Solid-state NMR of  $(\text{COD})\text{Pt}(\text{N}(\text{SiMe}_3)_2)(\text{OSi}(\text{OtBu})_3)@\text{SiO}_2\text{-200}$**

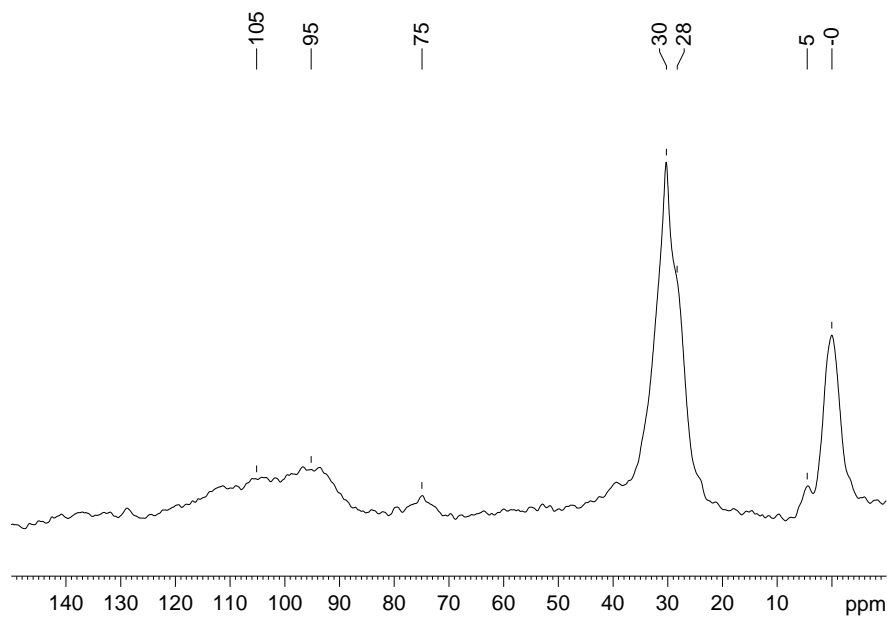

$^{13}\text{C}$  CP/MAS solid state NMR spectra of  $(\text{COD})\text{Pt}(\text{N}(\text{SiMe}_3)_2)(\text{OSi}(\text{OtBu})_3)@\text{SiO}_2\text{-200}$  ( $d_1 = 4$  s, 12490 scans,  $l_b = 100\text{Hz}$ )

**Solid-state NMR of  $\text{CODPt}(\text{N}(\text{SiMe}_3)_2)(\text{OSi}(\text{OtBu})_3)@\text{SiO}_2\text{-700}$**

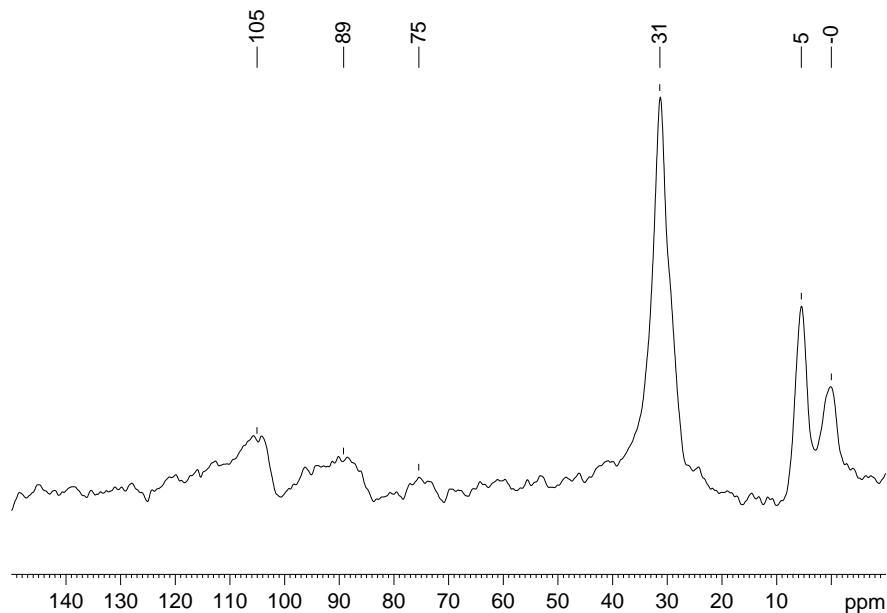

$^{13}\text{C}$  CP/MAS solid state NMR spectra of  $\text{CODPt}(\text{N}(\text{SiMe}_3)_2)(\text{OSi}(\text{OtBu})_3)@\text{SiO}_2\text{-700}$  ( $d_1 = 2$  s, 10416 scans,  $l_b = 100\text{Hz}$ )

**Figure S21. TEM**

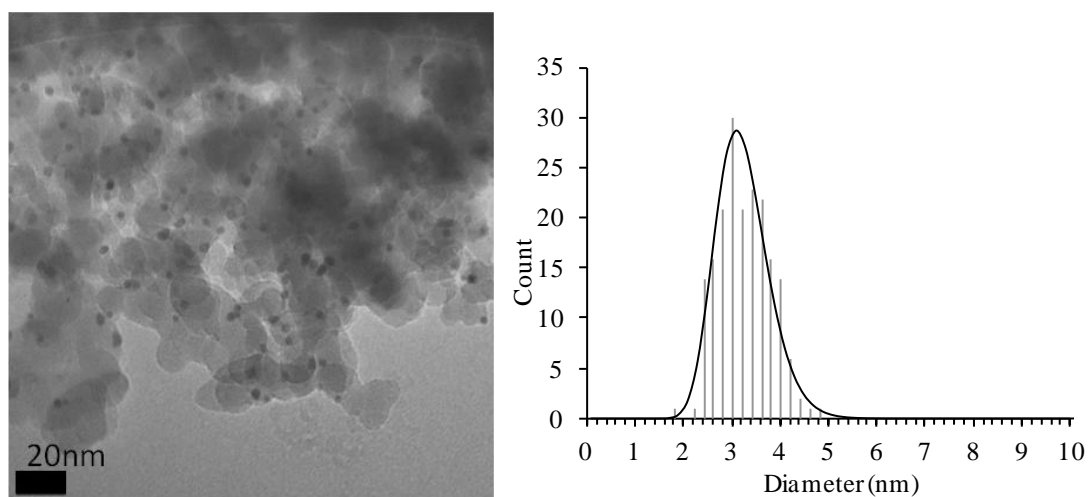

(COD)Pt(OSi(OtBu)<sub>3</sub>)(N(SiMe<sub>3</sub>)<sub>2</sub>)@SiO<sub>2-200</sub> treated under static H<sub>2</sub> atmosphere. 189

nanoparticles count. Mean size 3.2 ( $\sigma=0.5$ ).

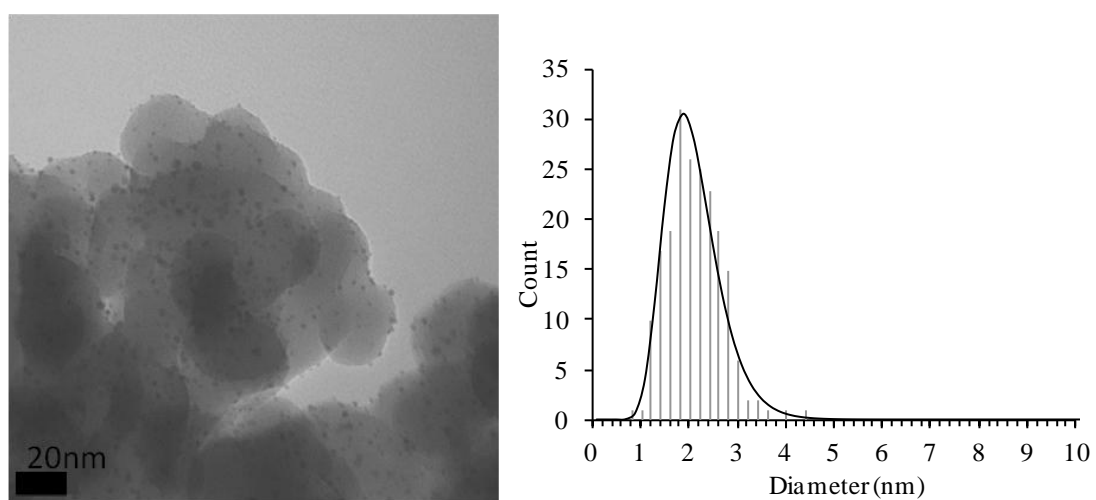

(COD)Pt(OSi(OtBu)<sub>3</sub>)(N(SiMe<sub>3</sub>)<sub>2</sub>)@SiO<sub>2-700</sub> treated under static H<sub>2</sub> atmosphere. 200

nanoparticles count. Mean size 2.1 ( $\sigma=0.6$ ).

## I. $\text{HOSi}(\text{OtBu})_3$

For the methyl-siloxy complexes grafting, IR-DRIFT reveals the presence of *t*Bu units on the surface, to address the question whether the silanol is absorbed or grafted on the surface,  $\text{SiO}_{2-700}$  was contacted with 1.2 equivalents of tris(tert-butoxy)silanol in pentane for 3 hours followed by multiple washings and secondary vacuum drying, mimicking the full process of a grafting procedure. Typical *t*Bu  $\nu(\text{C-H})$  vibrations at 2982, 2938, 2912 and 2877  $\text{cm}^{-1}$  are observed by IR-DRIFT. A large IR-band is observed at 3360  $\text{cm}^{-1}$  and can be attributed to the silanol of absorbed tris(tert-butoxy)silanol. By  $^{13}\text{C}$  SS-NMR the  $\text{C}(\text{CH}_3)_3$  and  $\text{C}(\text{CH}_3)_2$  are respectively found at 71 and 30 ppm.

After treatment under  $\text{H}_2$  under static atmosphere *t*Bu unit are still present at the surface as demonstrated by IR-DRIFT spectroscopy and consumption of surface OH is evidenced by the intensity diminution of the band at 3747  $\text{cm}^{-1}$ . Those observations indicates the probable formation of SiO bonds thus anchoring the tris(tert-butoxy)silanol to the surface.

**Figure S22. Solid-state NMR of  $\text{HOSi}(\text{OtBu})_3$  absorbed onto  $\text{SiO}_{2-700}$**

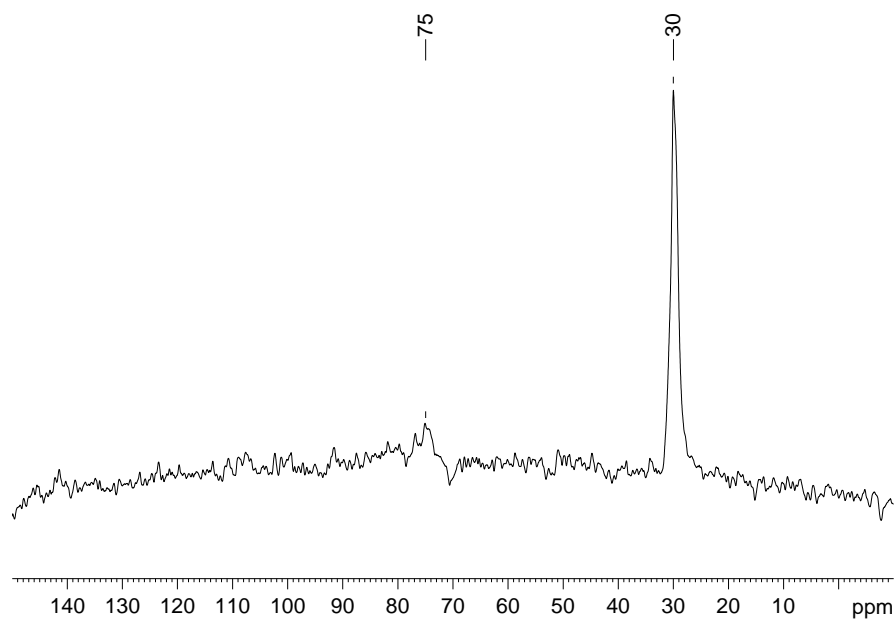

$^{13}\text{C}$  CP/MAS solid state NMR spectra of  $\text{HOSi}(\text{OtBu})_3@ \text{SiO}_{2-700}$  (d1 = 2 s, 28529 scans,  
lb=100Hz)

**Figure S23. IR-DRIFT**

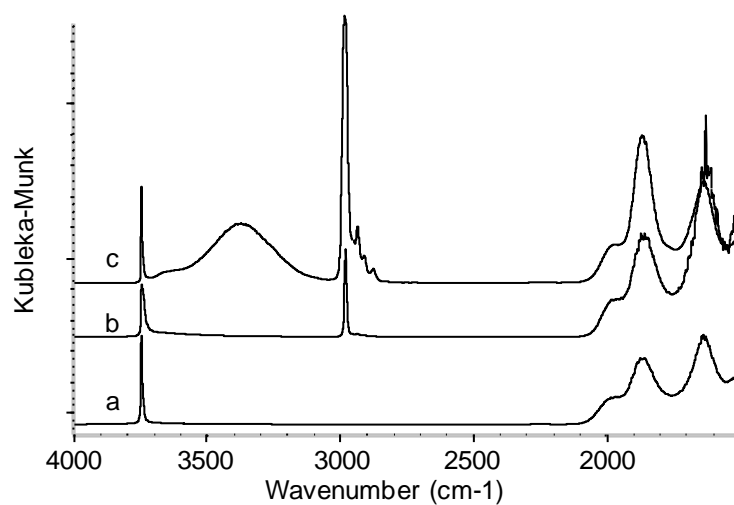

a)  $\text{SiO}_{2-700}$ , b) after static  $\text{H}_2$  treatment, c)  $\text{HOSi}(\text{tBu}_3)_3@ \text{SiO}_{2-700}$

|                      | grafted                  | after $\text{H}_2$ |
|----------------------|--------------------------|--------------------|
| $\text{SiO}_{2-700}$ | 3370/2983/2937/2911/2878 | 3747/2983          |

**Figure S24**

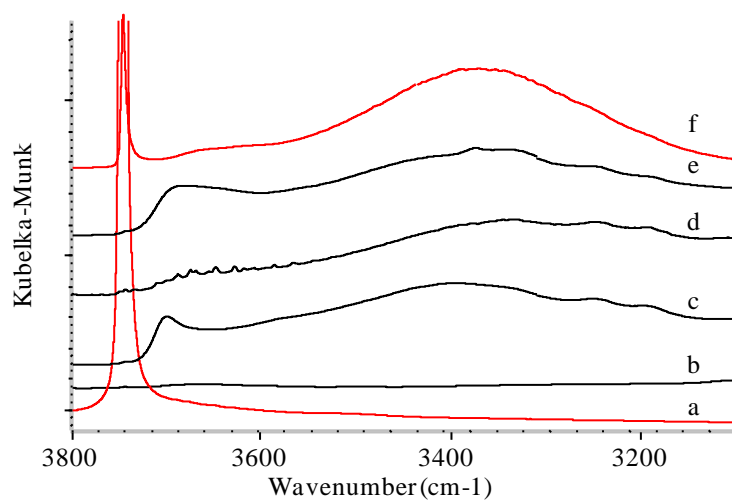

IR-DRIFT spectra of a)  $\text{SiO}_{2-700}$  b)  $(\text{COD})\text{Pt}(\text{Me})(\text{N}(\text{SiMe}_3)_2)@ \text{SiO}_{2-700}$ , c)  $(\text{COD})\text{Pt}(\text{OSi}(\text{OtBu})_3)_2@ \text{SiO}_{2-700}$ , d)  $(\text{COD})\text{Pt}(\text{Me})(\text{OSi}(\text{OtBu})_3)@ \text{SiO}_{2-700}$ , e)  $(\text{COD})\text{Pt}(\text{OSi}(\text{OtBu})_3)(\text{N}(\text{SiMe}_3)_2)@ \text{SiO}_{2-700}$ , f)  $\text{HOSi}(\text{OtBu})_3@ \text{SiO}_{2-700}$  (smaller Y scale).

## J. $^{13}\text{C}$ SS-NMR spectra of Pt complexes grafted onto $\text{SiO}_{2-200}$ .

Figure S25.

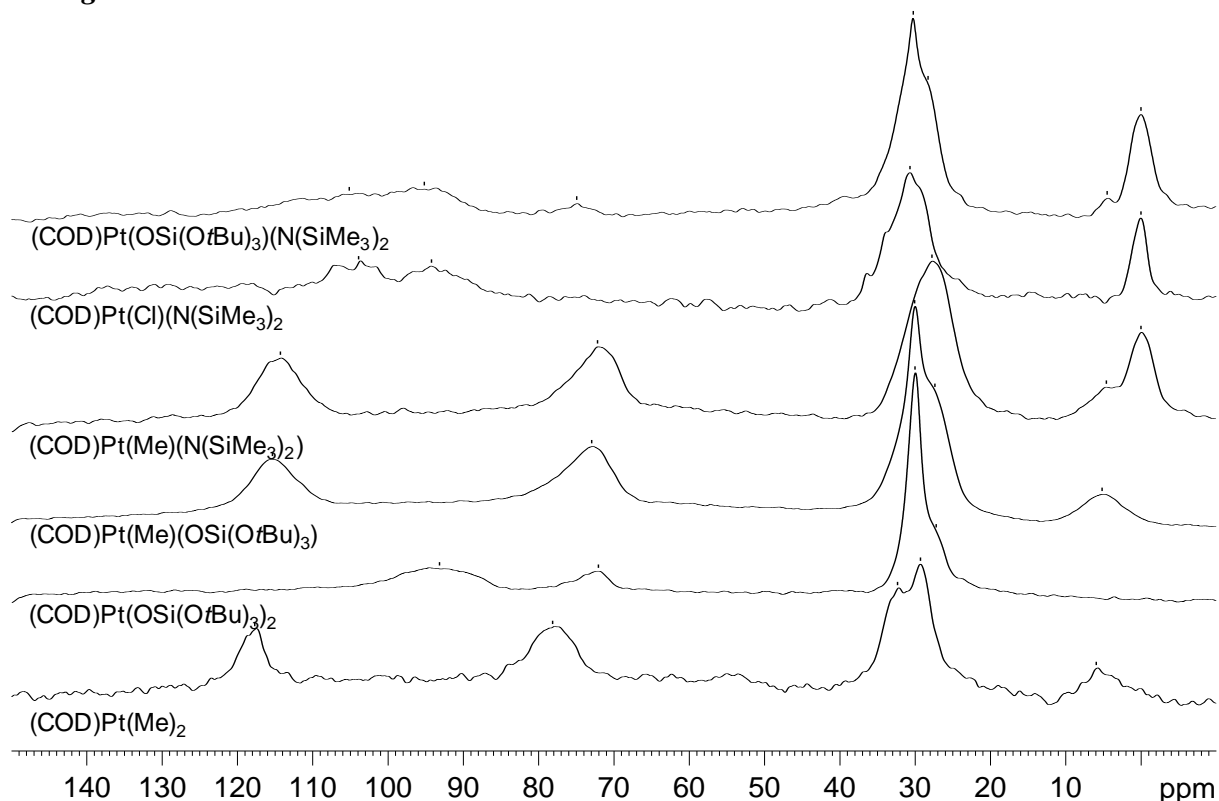

## K. Maximum surface coverage for (COD)Pt(R)(OSi≡) species

Table S2.

The maximum radius of the grafted molecule is determined from DRX data of (COD)Pt(R)(OSi(OtBu)<sub>3</sub>) when available. For (COD)Pt(Cl)(OSi≡) the measure is derived from the (COD)Pt(CH<sub>3</sub>)(OSi(OtBu)<sub>3</sub>) complex, considering the carbon atom of the methyl ligand as a chlorine atom. We consider the molecules as discs in dense packing, with a surface density of 0.9069.

| R                                  | radius Å | disc surface<br>nm <sup>2</sup> | Pt.nm <sup>-2</sup> |
|------------------------------------|----------|---------------------------------|---------------------|
| Me                                 | 0.37     | 0,43                            | 2,6                 |
| Cl                                 | 0.36     | 0,40                            | 2,8                 |
| OSi(OtBu) <sub>3</sub>             | 0.60     | 1,12                            | 1,0                 |
| N(SiMe <sub>3</sub> ) <sub>2</sub> | 0.52     | 0,83                            | 1,3                 |
